# Supplementary material
Source: MDPI journal article supplement (https://www.mdpi.com/2073-4441/13/6/815)
Supplement: s1 [file s1 › water-1141500-supplementary.pdf]

## Article

# Biomat Resilience to Desiccation and Flooding Within a Shallow, Unit Process Open Water Engineered Wetland

Adam R. Brady <sup>1,2,3</sup>, Michael A. Vega <sup>1,2</sup>, Kimberly N. Riddle <sup>1,2</sup>, Henry F. Peel <sup>1,2</sup>, Evelyn J. Lundeen <sup>1</sup>, Julia G. Siegmund <sup>1</sup>, Jonathan O. Sharp <sup>1,2,4,\*</sup>

<sup>1</sup> Department of Civil and Environmental Engineering, Colorado School of Mines, Golden, Colorado 80401, USA; abrady@mymail.mines.edu (A.R.B.), mavega@mymail.mines.edu (M.A.V.); krid-dle@mymail.mines.edu (K.N.R.); henrypeel@mymail.mines.edu (H.F.P.); evelyn.lundeen@gmail.com (E.J.L.); julia.g.siegmund@gmail.com (J.G.S.)

<sup>2</sup> Re-inventing the Nation's Urban Water Infrastructure (ReNUWIt) NSF Engineering Research Center, USA

<sup>3</sup> Department of Geography and Environmental Engineering, United States Military Academy, West Point, New York 10997, USA

<sup>4</sup> Hydrologic Science and Engineering Program, Colorado School of Mines, Golden, Colorado 80401, USA

\* Correspondence: jsharp@mines.edu

## Supplemental Information

### Table of Contents

1. Materials and Methods
  - 1.1. USGS Hydrographs from selected Santa Ana River locations during flood event
  - 1.2. DNA Extraction, Sequencing, and Analysis
  - 1.3. Analog Wetland Water Influent Recipe
2. Results
  - 2.1. Adonis and Beta Dispersion Results for Microbial Ecology Comparison
  - 2.2. Microbial Community UniFrac and DCA PCoAs
  - 2.3. Relative Abundance of Biomat Types

**Citation:** Brady, A.R.; Vega, M.A.; Riddle, K.N.; Peel, H.F.; Lundeen, E.J.; Siegmund, J.G.; Sharp, J.O. Biomat Resilience to Desiccation and Flooding Within a Shallow, Unit Process Open Water Engineered Wetland. *Water* **2021**, *13*, 815. <https://doi.org/10.3390/w13060815>

Academic Editor: Pedro N. Carvalho

Received: 24 February 2021

Accepted: 12 March 2021

Published: 16 March 2021

**Publisher's Note:** MDPI stays neutral with regard to jurisdictional claims in published maps and institutional affiliations.

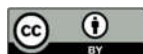

**Copyright:** © 2021 by the authors. Licensee MDPI, Basel, Switzerland. This article is an open access article distributed under the terms and conditions of the Creative Commons Attribution (CC BY) license (<http://creativecommons.org/licenses/by/4.0/>).

### 1.1. USGS Hydrographs from Selected Santa Ana River Locations During Flood Event

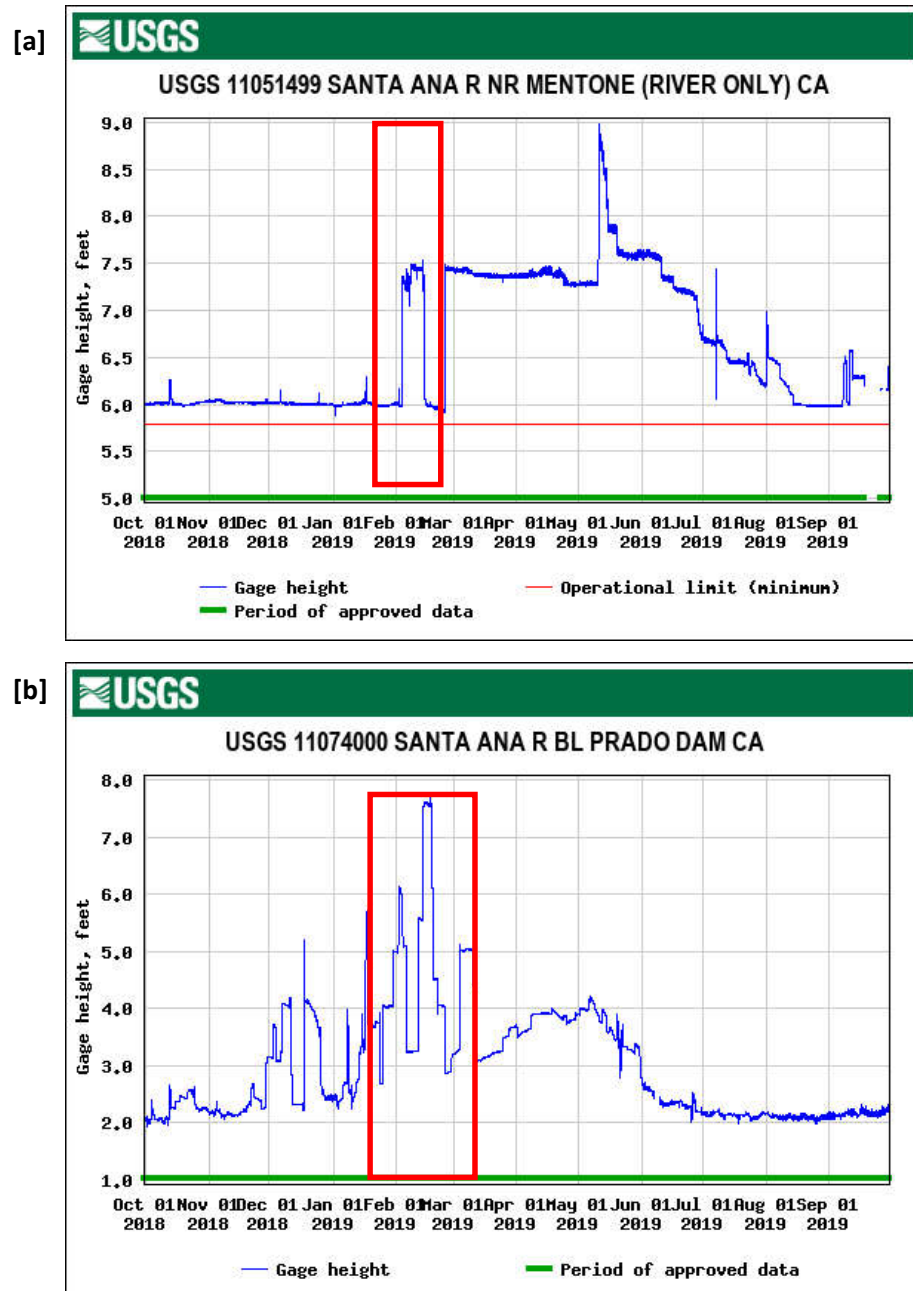

**Figure S1.** USGS hydrographs from Santa Ana River near Prado Wetlands demonstrate high flows during period of flood event. [a] Illustrates the February high flow period was not higher than the following months. [b] Demonstrates the gage height at the Prado Dam, illustrating the confluence of events that occurred during the time period (high storage pool) and high flows that resulted in the levee break inundating the Prado Wetlands. The rebuilt levee held in the following months, demonstrating the need for proactive design and implementation.

### 1.2. DNA Extraction, Sequencing, and Analysis

For 16S rRNA gene sequencing, PCR amplification was performed using 2  $\mu$ L template DNA in a 25  $\mu$ L reaction using 5PRIME HotMasterMix (Quanta Biosciences, Beverly, MA, United States) with a nearly universal bacterial and archaeal primer set as per Kraus et al. (2018); the forward primer 515F-Y with the M13 primer (bolded) and gene specific

forward primer (underlined) (GTA AAA CGA CGG CCA G CCG TGY CAG CMG CCG CCG TAA-3') [1] while the reverse primer 926R (5'-CCGYCAATTYMTTTRAGTTT-3') was unmodified from Parada et al. (2016) [2].

Raw reads were demultiplexed with AdapterRemoval [3] and imported into R for quality visualization and processing using DADA2 [4]. Adapters were manually trimmed with forward and reverse reads truncated to 239 and 251 base pairs, respectively. The respective maximum expected errors were limited to 2. Filtered and trimmed reads were then dereplicated, denoised and merged. Chimeric sequences were identified and removed based on identification by consensus.

### 1.3. Prado Wetlands Analog Water

**Table S1.** Analog water recipe based on Prado Wetlands influent without  $\text{NO}_3^-$  or  $\text{NO}_2^-$  [5].

\* $\text{NaNO}_3$  utilized for specific  $\text{NO}_3^-$  concentration (15 mg/L – N).

| Salt                                      | MW (g/mol) | g/L   |
|-------------------------------------------|------------|-------|
| $\text{MgSO}_4 \cdot 7\text{H}_2\text{O}$ | 246.5      | 0.12  |
| $\text{CaCl}_2$                           | 147.0      | 0.24  |
| $\text{K}_2\text{HPO}_4$                  | 136.09     | 0.01  |
| $\text{NaHCO}_3$                          | 84.01      | 0.30  |
| $\text{Na}_2\text{SO}_4$                  | 142.02     | 0.05  |
| KCl                                       | 74.55      | 0.025 |
| NaCl                                      | 58.4       | 0.064 |
| * $\text{NaNO}_3$<br>(15 mg/L – N)        | 85.0       | 0.091 |
| * $\text{NaNO}_3$<br>(30 mg/L – N)        | 170.0      | 0.182 |

## 2. Results

### 2.1. Adonis and Beta-Dispersion Results for Microbial Ecology Comparison

**Table S2.** The post-flood biomat community was significantly different from mature and nascent biomats, as seen in the adonis results below. Additionally, the rehydrated biomat microbial communities were significantly different from mature, nascent, and fresh biomat communities.

| Comparison                  | Adonis           |                |         | Beta Dispersion |         | Distance from Centroid |                |            |       |
|-----------------------------|------------------|----------------|---------|-----------------|---------|------------------------|----------------|------------|-------|
|                             | Distance Matrix  | R <sup>2</sup> | P-Value | P-Value         | Nascent | Mature                 | Flood-Impacted | Rehydrated | Fresh |
| Mature : Flood-Impacted     | Weighted UniFrac | 0.50           | 0.001   | 0.38            | n/a     | 0.12                   | 0.098          | n/a        | n/a   |
| Mature : Flood-Impacted     | UniFrac          | 0.29           | 0.001   | 0.015           | n/a     | 0.36                   | 0.47           | n/a        | n/a   |
| Rehydrated : Mature         | Weighted UniFrac | 0.50           | 0.002   | 0.021           | n/a     | 0.12                   | n/a            | 0.050      | n/a   |
| Rehydrated : Mature         | UniFrac          | 0.46           | 0.002   | 0.025           | n/a     | 0.36                   | n/a            | 0.26       | n/a   |
| Nascent : Rehydrated        | Weighted UniFrac | 0.49           | 0.002   | 0.007           | 0.15    | n/a                    | n/a            | 0.050      | n/a   |
| Nascent : Rehydrated        | UniFrac          | 0.34           | 0.002   | 0.001           | 0.4725  | n/a                    | n/a            | 0.26       | n/a   |
| Nascent : Mature            | Weighted UniFrac | 0.41           | 0.001   | 0.311           | 0.15    | 0.12                   | n/a            | n/a        | n/a   |
| Nascent : Mature            | UniFrac          | 0.25           | 0.001   | 0.04            | 0.47    | 0.36                   | n/a            | n/a        | n/a   |
| Rehydrated : Fresh          | Weighted UniFrac | 0.91           | 0.034   | 0.11            | n/a     | n/a                    | n/a            | 0.050      | 0.031 |
| Rehydrated : Fresh          | UniFrac          | 0.51           | 0.034   | 0.05            | n/a     | n/a                    | n/a            | 0.26       | 0.31  |
| Rehydrated : Flood-Impacted | Weighted UniFrac | 0.56           | 0.008   | 0.038           | n/a     | n/a                    | 0.098          | 0.050      | n/a   |
| Rehydrated : Flood-Impacted | UniFrac          | 0.34           | 0.008   | 0.001           | n/a     | n/a                    | 0.47           | 0.26       | n/a   |

## 2.2. Microbial Community UniFrac and DCA Ordinations

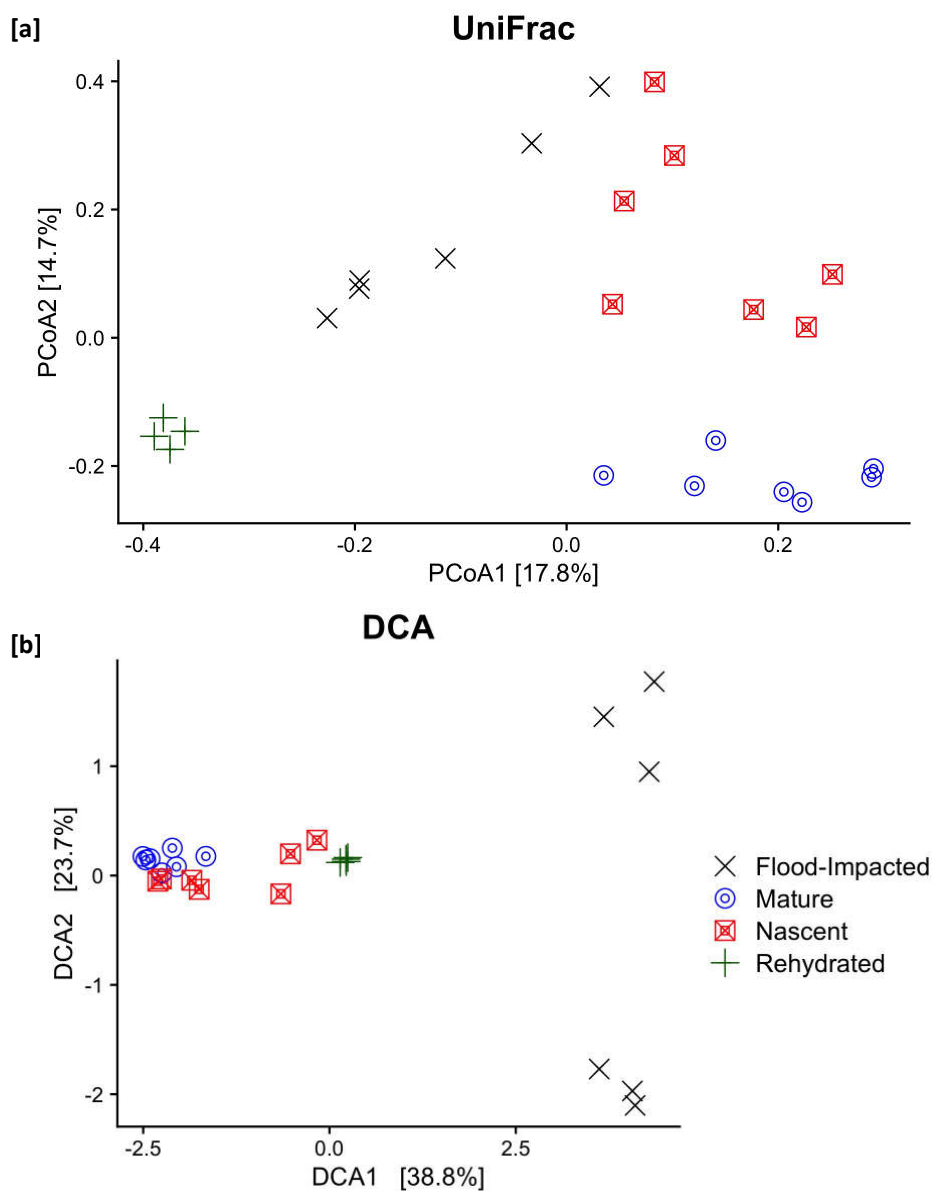

**Figure S2.** Ordinations demonstrate the changes in 16S rRNA gene microbial community structure by sample types. Though Weighted UniFrac distances were used in the primary analysis, a PCoA using UniFrac distances [a] and the Detrended Correspondence Analysis (DCA) [b] show the grouping of communities by sample type were evident in all visualizations.

### 2.3. Rank Abundance of Biomat Types

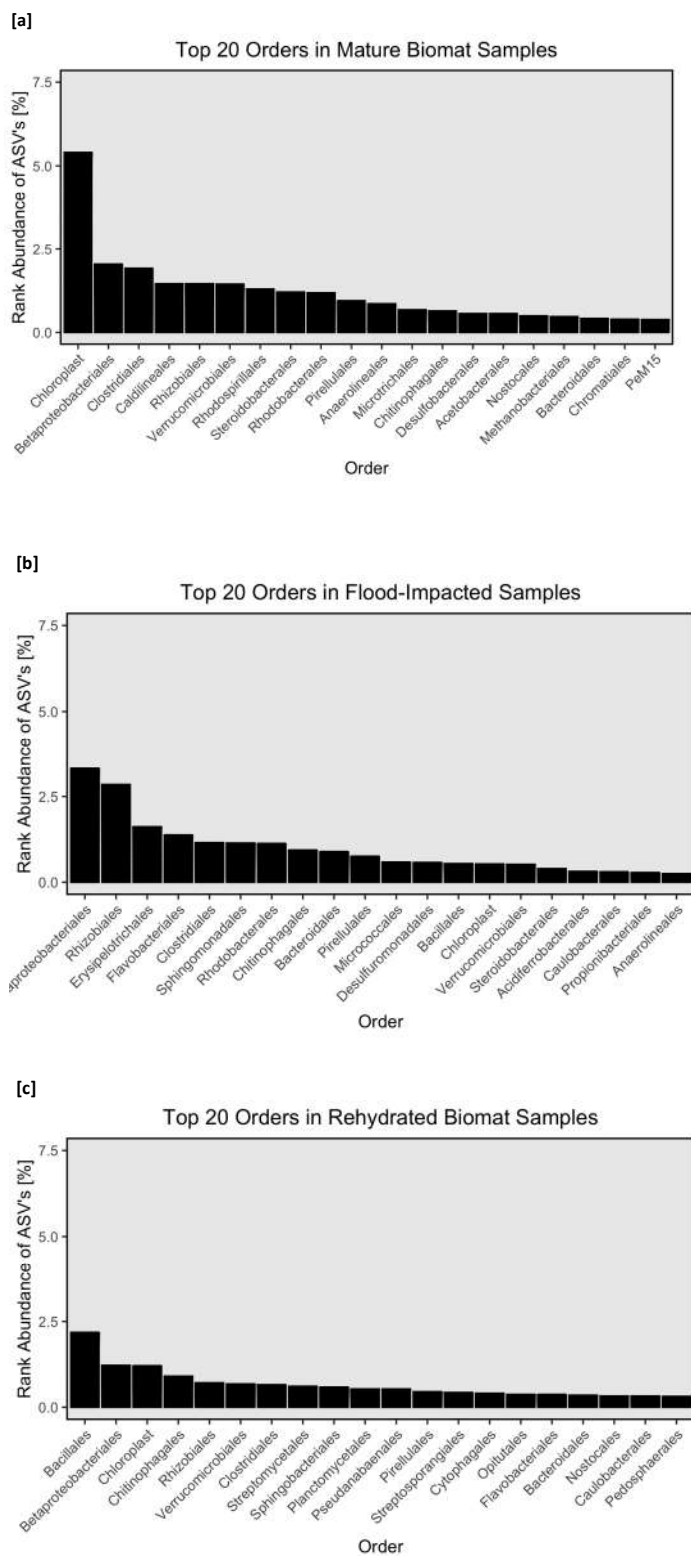

**Figure S3.** Rank abundance of the Top 20 Orders in each biomat type: mature biomat **[a]**, flood-impacted biomat **[b]**, and rehydrated biomat **[c]**.

## References

1. Kraus, E.A.; Beeler, S.R.; Mors, R.A.; Floyd, J.G.; Stamps, B.W.; Nunn, H.S.; Stevenson, B.S.; Johnson, H.A.; Shapiro, R.S.; Loyd, S.J.; et al. Microscale Biosignatures and Abiotic Mineral Authigenesis in Little Hot Creek, California. *Front. Microbiol.* **2018**, *9*, 1–13.
2. Parada, A.E.; Needham, D.M.; Fuhrman, J.A. Every base matters: Assessing small subunit rRNA primers for marine microbiomes with mock communities, time series and global field samples. *Environ. Microbiol.* **2016**, *18*, 1403–14.
3. Schubert, S.; Lindgreen, S.; Orlando, L. AdapterRemoval v2: rapid adapter trimming, identification, and read merging. *BMC Research Notes*, **2016**, *9*, 88 <http://bmcrnnotes.biomedcentral.com/articles/10.1186/s13104-016-1900-2>.
4. Callahan, B.J.; McMurdie, P.J.; Rosen, M.J.; Han, A.W.; Johnson, A.J.A.; Holmes, S.P. DADA2: High-resolution sample inference from Illumina amplicon data. *Nat. Methods* **2016**, *13*, 581–3.
5. Reed, A.P. Diel redox cycling and its impact on inorganic nitrogen in an engineered wetland designed for water treatment. Master's Thesis, Colorado School of Mines, Golden, Colorado, USA, 10 June 2019. Available from: <https://mountainscholar.org/handle/11124/173018>
